# Supplementary material
Source: publisher figshare collection journal article supplement (https://asha.figshare.com/articles/dataset/_/13524317)
Supplement: Supplementary file 1 [file 1]

*Overview of lesson plan content focus by week with relevant English Language Arts (ELA) Common Core State Standard (CCSS) for grades K, 1, 2, and 3.*

| <b>Week</b> | <b>Lesson Plan Content Focus</b>                     | <b>Common Core State Standard</b>                                                                              |
|-------------|------------------------------------------------------|----------------------------------------------------------------------------------------------------------------|
| Week 1      | Introduction to the concept<br>Dialect-Shifting      | CCSS.ELA-LITERACY.L.K.1<br>CCSS.ELA-LITERACY.L.1.5.A<br>CCSS.ELA-LITERACY.L.2.3.A<br>CCSS.ELA-LITERACY.L.3.3   |
| Week 2      | Reinforcement Lesson: Concept<br>of Dialect-Shifting | CCSS.ELA-LITERACY.L.K.1<br>CCSS.ELA-LITERACY.L.1.5.A<br>CCSS.ELA-LITERACY.L.2.3.A<br>CCSS.ELA-LITERACY.L.3.3   |
| Week 3      | Possessive Nouns                                     | CCSS.ELA-LITERACY.L.K.1.C<br>CCSS.ELA-LITERACY.L.1.1.B<br>CCSS.ELA-LITERACY.L.2.1<br>CCSS.ELA-LITERACY.L.3.2.D |
| Week 4      | Plural Nouns                                         | CCSS.ELA-LITERACY.L.K.1<br>CCSS.ELA-LITERACY.L.1.1.C<br>CCSS.ELA-LITERACY.L.2.1<br>CCSS.ELA-LITERACY.L.3.1.F   |
| Week 5      | Present Progressives: gonna v<br>going to            | CCSS.ELA-LITERACY.L.K.1<br>CCSS.ELA-LITERACY.L.1.2.D<br>CCSS.ELA-LITERACY.L.2.3.A<br>CCSS.ELA-LITERACY.L.3.3   |
| Week 6      | Leaving –g/-ing off                                  | CCSS.ELA-LITERACY.L.K.1<br>CCSS.ELA-LITERACY.L.1.2.D<br>CCSS.ELA-LITERACY.L.2.2<br>CCSS.ELA-LITERACY.L.3.2.E   |
| Week 7      | REVIEW WEEK                                          | REVIEW WEEK                                                                                                    |
