# Supplementary material
Source: publisher figshare collection journal article supplement (https://asha.figshare.com/articles/dataset/_/13524317)
Supplement: Supplementary file 3 [file 1]

Child ID: \_\_\_\_\_

### **Situational Shifting**

**Instructions:** We are going to play a game about where people use informal/home language (AAE) or informal/school language (MAE). In the first part of the game, I am going to ask you to define or tell me what informal/home language (AAE) or informal/school language (MAE) is. In the second part of the game, I am going to say a person or place and I want you to tell me if you would use informal/home language (AAE) or informal/school language (MAE). There is no right or wrong answer I just want you to try your best. If you need me to repeat something, I can say it again one time so listen carefully. Let's begin!

1. Define what is informal/home language? **Score: 0 1**

**Answer:**

- 1b. When would you use it? **Score: 0 1**

**Answer:**

2. Define what is formal/school language? When would you use it? **Score: 0 1**

**Answer:**

- 2b. When would you use it? **Score: 0 1**

**Answer:**

3. If you were talking to your sister or brother, would you use formal or informal language?  
**Score: 0 1**

**Circle Response:**      **Informal**                      **Formal**

4. If you were talking to your principal, would you use formal or informal language?  
**Score: 0 1**

**Circle Response:**      **Informal**                      **Formal**

5. If you were answering a question during class, would you use formal or informal language? **Score: 0 1**

**Circle Response:**      **Informal**                      **Formal**

6. If you were talking to friends on the playground, would you use formal or informal language? **Score: 0 1**

**Circle Response:**      **Informal**                      **Formal**

7. If you were writing in your journal or diary at home, would you use formal or informal language? **Score: 0 1**

**Circle Response:**      **Informal**                      **Formal**

8. If you were giving a presentation at church, would you use formal or informal language? **Score: 0 1** (\*\*this question was appropriate since the school was a private religious school)

**Circle Response:**      **Informal**                      **Formal**

9. If you were writing for a school assignment, would you use formal or informal language? **Score: 0 1**

**Circle Response:**      **Informal**                      **Formal**

10. If you were meeting the president of the United States, would you use formal or informal language? **Score: 0 1**

**Circle Response:**      **Informal**                      **Formal**

11. If you were talking to a close friend of the family at the barbershop or hair salon, would you use formal or informal language? **Score: 0 1**

**Circle Response:**      **Informal**                      **Formal**

12. If you were talking to a new person at the White House, would you use formal or informal language? **Score: 0 1**

**Circle Response:**      **Informal**                      **Formal**

## Scoring

The answer key with examples is included below. "Correct" answers were determined based on how informal and formal language were targeted within the curriculum.

- 1a. Define what is informal/home language? **Score: 0 1**

**To receive a score of 1, the answers must include an aspect of the following phrases:**

- A) informal language is African American English**
- B) informal language is how I talk every day or is everyday language**
- C) informal language is how my family and I talk to each other**
- D) informal language is how I talk to my friends and family, or familiar community members**

- 1b. Where would you use it? **Score: 0 1**

**To receive a score of 1 the answers must include an aspect of the following phrases:**

- A) I would use informal language at home, on the playground, at the barbershop, at community events,**
- B) Answers that talk about "who" they would use it with is also acceptable (family, friends, people thy are familiar with)**

2. Define what is formal/school language? When would you use it? **Score: 0 1**

**To receive a score of 1 the answers must include an aspect of the following phrases:**

- A) informal language is Mainstream American English**
- B) formal language is how I talk in or school, or what I use when I write/answer questions**
- C) formal language is how I talk to my teacher, principal, or someone new I'm meeting**
- D) formal language is school language**

- 2b. When would you use it? **Score: 0 1**

**To receive a score of 1 the answers must include an aspect of the following phrases:**

- A) I would use formal language at school, at new places I go, the White House, when I'm writing**
- B) Answers that talk about "who" they would use it with are also acceptable (new people I meet, teacher, principals, new people I meet, President, new teacher)**

3. If you were talking to your sister or brother, would you use formal or informal language?

**Score: 0 1**

**Circle Response:** ☒ **Informal** ☐ **Formal**

4. If you were talking to your principal, would you use formal or informal language?

**Score: 0 1**

**Circle Response:** ☐ **Informal** ☒ **Formal**

5. If you were answering a question during class, would you use formal or informal language? **Score: 0 1**

**Circle Response:** ☐ **Informal** ☒ **Formal**

6. If you were talking to friends on the playground, would you use formal or informal language? **Score: 0 1**

**Circle Response:** ☒ **Informal** ☐ **Formal**

7. If you were writing in your journal or diary at home, would you use formal or informal language? **Score: 0 1**

**Circle Response:** ☒ **Informal** ☐ **Formal**

8. If you were writing in your journal or diary at home, would you use formal or informal language? **Score: 0 1**

**Circle Response:** ☐ **Informal** ☒ **Formal**

9. If you were giving a presentation at church, would you use formal or informal language?  
**Score: 0 1 (\*\*this question was appropriate since the school was a private religious school)**

**Circle Response:** ☐ **Informal** ☒ **Formal**

10. If you were meeting the president of the United States, would you use formal or informal language? **Score: 0 1**

**Circle Response:** ☐ **Informal** ☒ **Formal**

11. If you were talking to a close friend of the family at the barbershop or hair salon, would you use formal or informal language? **Score: 0 1**

**Circle Response:** ☒ **Informal** ☐ **Formal**

12. If you're talking to your football or cheerleading coach, would you use formal or informal language? **Score: 0 1**

**Circle Response:** ☒ **Informal** ☐ **Formal**
